# Supplementary material for: Dual-energy CT for the diagnosis of gout: an accuracy and diagnostic yield study
Source: PubMed Central journal article supplement — Ann Rheum Dis. 2014 Mar 26;74(6):1072–7. doi: 10.1136/annrheumdis-2013-205095 (PMC4431329; doi:10.1136/annrheumdis-2013-205095), 2014-03-26
Supplement: annrheumdis-2013-205095-s1.pdf [file annrheumdis-2013-205095-s1.pdf]

Supplement 1

| <b>Scan</b>                 |              |
|-----------------------------|--------------|
| Scan Type                   | Spiral       |
| Rotation Time (s)           | 1.0          |
| Collimation (mm)            | 40 x 0.6     |
| Pitch                       | 1.2          |
| kVp                         |              |
| <i>Tube A</i>               | 80           |
| <i>Tube B</i>               | <i>Sn140</i> |
| Quality reference mAs       |              |
| <i>Tube A</i>               | 340          |
| <i>Tube B</i>               | 238          |
| CARE Dose                   | ON           |
| CTDI <sub>vol</sub> (mGy)   | 15           |
| <b>Reconstruction</b>       |              |
| Kernel                      | D30          |
| Slice Thickness (mm)        | 0.6          |
| Slice Interval (mm)         | 0.3          |
| FOV (mm)                    | 120          |
| DE Composition              | 0.4          |
| <b>Dual Energy Analysis</b> |              |
| Soft Tissue 80 kV (HU)      | 50           |
| Soft Tissue 140 kV (HU)     | 50           |
| Dual Energy Ratio           | 1.36         |
| Minimum HU                  | 150          |
| Maximal HU                  | 500          |
| Range                       | 3            |
